# Supplementary material
Source: publisher site journal article supplement (https://www.degruyterbrill.com/publication/isbn/9783486842807/downloadAsset/9783486842807_Buchinformation.pdf)
Supplement: Supplementary file 1 [file 9783486842807_Buchinformation.pdf]

## Verwaltungsdoppik im Detail

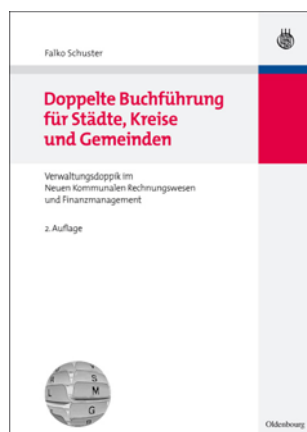

Falko Schuster

### Doppelte Buchführung für Städte, Kreise und Gemeinden

Grundlagen der Verwaltungsdoppik im Neuen Kommunalen Rechnungswesen und Finanzmanagement

2., überarb. u. erw. Aufl. 2007 I XII I 314 S. I Br.

€ 34,80

ISBN 978-3-486-58221-5

In den vergangenen Jahren hat die Relevanz der doppelten Buchführung in den öffentlichen Verwaltungen erheblich zugenommen.

Der Autor führt in der bereits zweiten Auflage dieses Buches kundig an dieses Thema heran und zeigt auch die Besonderheiten der Verwaltungsdoppik im Detail auf. Dabei berücksichtigt er auch die gravierenden Veränderungen, die sich in den letzten Jahren im öffentlichen Rechnungswesen ergeben haben.

Durch eine Vielzahl von Buchungsbeispielen kann der Leser den Stoff üben. Darüber hinaus geben diese Beispiele Einblick in die buchhalterische Praxis eines öffentlichen Verwaltungsbetriebs.

---

Das Buch richtet sich an Mitarbeiterinnen und Mitarbeiter in den kommunalen Verwaltungsbetrieben. Darüber hinaus eignet es sich für Studierende der Verwaltungswissenschaften.

---

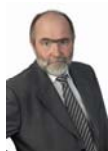

Prof. Dr. Falko Schuster lehrt Öffentliche Betriebswirtschaftslehre an der Fachhochschule für öffentliche Verwaltung des Landes Nordrhein-Westfalen.

[oldenbourg.de](http://oldenbourg.de)

Oldenbourg Wissenschaftsverlag I Pressereferat I Rosenheimer Str. 145 I 81679 München I Tel.: +49 89 45051-467 I Fax: +49 89 45051-292 I [kuttig@oldenbourg.de](mailto:kuttig@oldenbourg.de)

Alle Veröffentlichungen des Oldenbourg Verlags sind über den Buchhandel zu beziehen. Bei Lieferung fallen Versandgebühren an. Rezensionsexemplare auf Anforderung.
